# Supplementary material for: Water-soluble non-polymeric electrospun cyclodextrin nanofiber template for the synthesis of metal oxide tubes by atomic layer deposition
Source: Royal Society of Chemistry journal article supplement (doi:10.1039/c4ra12073f), 2014-01-01
Supplement: c4ra12073f1.pdf [file c4ra12073f1.pdf]

## Water-Soluble Non-Polymeric Electrospun Cyclodextrin Nanofiber Template for the Synthesis of Metal Oxide Tubes by Atomic Layer Deposition

Asli Celebioglu <sup>ab</sup>, Sesha Vempati <sup>\*a</sup>, Cagla Ozgit-Akgun <sup>ab</sup>, Necmi Biyikli <sup>ab</sup> and Tamer Uyar <sup>\*ab</sup>

<sup>a</sup> UNAM-National Nanotechnology Research Center, Bilkent University, Ankara, 06800, Turkey

<sup>b</sup> Institute of Materials Science and Nanotechnology, Bilkent University, Ankara, 06800, Turkey

E-mail: svempati01@qub.ac.uk; uyar@unam.bilkent.edu.tr

### Electronic Supplementary information

**Table 1:** Characteristics of deconvoluted peaks from XRD for three selected reflections. FWHM stands for full width at half maximum.

|       | (°)           | ZM2                  | ZM2_W                | ZH4                  | ZH4_W                |
|-------|---------------|----------------------|----------------------|----------------------|----------------------|
| (100) | Peak position | 31.944 ± 0.005       | 31.941 ± 0.002       | 32.068 ± 0.002       | 31.940 ± 0.003       |
|       | FWHM          | 0.794 ± 0.016        | 0.809 ± 0.008        | 0.656 ± 0.008        | 0.741 ± 0.011        |
| (002) | Peak position | 34.358 ± 0.009       | 34.349 ± 0.004       | 34.457 ± 0.007       | 34.339 ± 0.006       |
|       | FWHM          | <b>1.342 ± 0.035</b> | <b>1.196 ± 0.013</b> | <b>1.289 ± 0.024</b> | <b>1.120 ± 0.020</b> |
| (101) | Peak position | 36.271 ± 0.008       | 36.274 ± 0.003       | 36.387 ± 0.005       | 36.264 ± 0.005       |
|       | FWHM          | 1.334 ± 0.027        | 1.335 ± 0.011        | <b>1.279 ± 0.017</b> | <b>1.168 ± 0.019</b> |

**Table 2:** Results of XPS survey scan given in atomic percentage. Carbon contamination is majorly observed while a signature of Cl or P is also seen as the experiments are performed in ambient lab environment. \* indicates only contamination from C.

|       |       |       |                          |
|-------|-------|-------|--------------------------|
|       | Al    | O     | C and other contaminants |
| AM2_W | 25.67 | 41.37 | 32.96                    |
| AH2_W | 28.48 | 51.05 | 20.47*                   |
|       | Zn    | O     | C/other contaminants     |
| ZM2_W | 21.39 | 31.18 | 47.43                    |
| ZH4_W | 28.28 | 37.81 | 33.91                    |

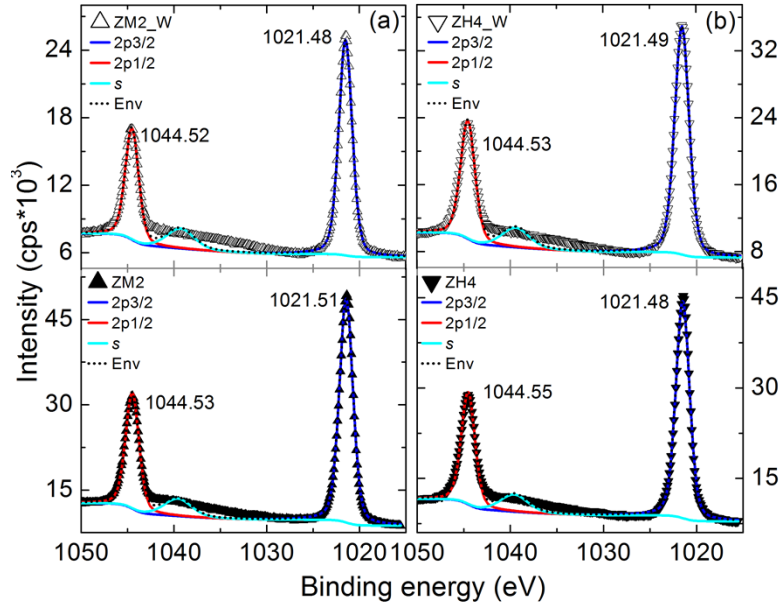

**Figure 1.** Zn2p XPS core-level spectra from electrospun fibers before and after washing steps. (a) ZM2, (b) ZM2\_W, (c) ZH4, (d) ZH4\_W. Satellite peak is annotated with 's'. The peak positions are annotated on the image in eV.
